# Supplementary material for: Treeline dynamics with climate change at the central Nepal Himalaya
Source: Copernicus journal article supplement (doi:10.5194/cp-10-1277-2014), 2014-07-04
Supplement: Supplementary file 1 [file cp-10-1277-2014-supplement.pdf]

Supplement of *Clim. Past*, 10, 1277–1290, 2014  
<http://www.clim-past.net/10/1277/2014/>  
doi:10.5194/cp-10-1277-2014-supplement  
© Author(s) 2014. CC Attribution 3.0 License.

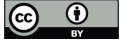

*Supplement of*

## **Treeline dynamics with climate change at the central Nepal Himalaya**

**N. P. Gaire et al.**

*Correspondence to:* N. P. Gaire (npgaire2007@gmail.com)



24 **Table S1.** Tree cores and cut stumps samples collected from MCA for this study.

25

| <b>Species</b>           | <b>Number of<br/>cores/trees</b> | <b>Number of cut<br/>stumps/trees</b> | <b>Total</b> |
|--------------------------|----------------------------------|---------------------------------------|--------------|
| <i>Abies spectabilis</i> | 139/98                           | 33/33                                 | 172          |
| <i>Betula utilis</i>     | 66/33                            | 11/6                                  | 77           |

26

27 **Table S2.** Descriptive statistics of structural parameters of trees at Transect 1 (T1) and  
 28 Transect 2 (T2) at the treeline ecotone of Kalchuman Lake area, MCA. \* Includes all  
 29 seedling, sapling and tree individuals.

30

| Species            |           | Height* (m) |      | DBH (cm) |      | Age* (yr) |      |
|--------------------|-----------|-------------|------|----------|------|-----------|------|
|                    |           | T1          | T2   | T1       | T 2  | T1        | T2   |
| <i>Abies</i>       | Mean      | 1.9         | 2.2  | 22.6     | 10.9 | 18.2      | 22.1 |
| <i>spectabilis</i> | Median    | 0.24        | 1.38 | 20.5     | 10.5 | 7         | 19   |
|                    | Std.      | 3.6         | 1.8  | 15.9     | 7.9  | 27.6      | 10.1 |
|                    | Deviation |             |      |          |      |           |      |
|                    | Maximum   | 18          | 6.5  | 66       | 32   | 160       | 52   |
| <i>Betula</i>      | Mean      | 6.35        | 4.72 | 22.2     | 13.3 | 111.3     | 79.0 |
| <i>utilis</i>      | Median    | 6.5         | 5.0  | 22.0     | 12.0 | 110.5     | 73.2 |
|                    | Std.      | 1.7         | 1.4  | 10.5     | 7.7  | 39.7      | 31.4 |
|                    | Deviation |             |      |          |      |           |      |
|                    | Maximum   | 11.5        | 8    | 46.5     | 38.0 | 198       | 166  |

31

32 **Table S3.** Number of seedlings, saplings and trees at study plots.

| Transect | Species                  | Number of individuals |         |      | Total |
|----------|--------------------------|-----------------------|---------|------|-------|
|          |                          | Seedling              | Sapling | Tree |       |
| T1       | <i>Abies spectabilis</i> | 127                   | 31      | 42   | 200   |
|          | <i>Betula utilis</i>     | 0                     | 0       | 112  | 112   |
| T2       | <i>Abies spectabilis</i> | 4                     | 21      | 18   | 43    |
|          | <i>Betula utilis</i>     | 0                     | 2       | 78   | 80    |
| Total    |                          |                       |         |      | 435   |

33

34 **Table S4.** Selected statistics of tree-ring chronology of *Abies spectabilis* from Kalchuman  
 35 Lake area, MCA.

| <b>Statistics</b>                       | <b>Standard Chronology</b> |
|-----------------------------------------|----------------------------|
| Chronology Time Span                    | A.D. 1782-2010             |
| Number of Trees (radii)                 | 29 (46)                    |
| Mean Sensitivity                        | 0.136                      |
| Standard Deviation                      | 0.18                       |
| AR modeling order 1                     | 0.592                      |
| Common Interval Time Span               | A.D. 1920-2005             |
| Number of Trees (radii)                 | 24 (39)                    |
| Mean correlation among all radii        | 0.196                      |
| Mean correlation between trees          | 0.192                      |
| Mean correlation within trees           | 0.467                      |
| Signal-to-noise ratio                   | 11.23                      |
| Expressed population signal             | 0.918                      |
| Variance explained by first eigenvector | 24.4%                      |

36

37

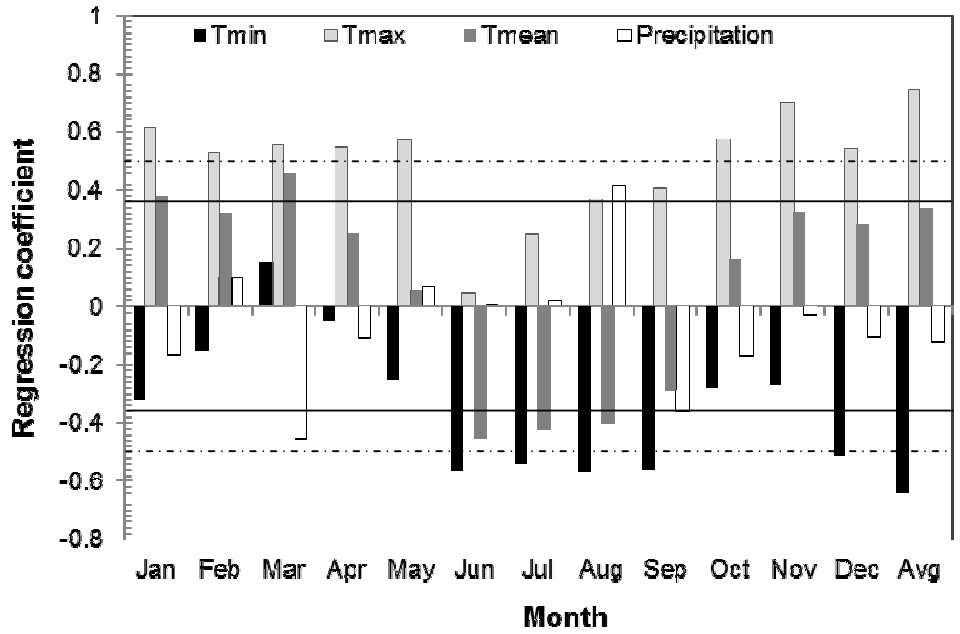

38

39 **Fig. S1.** Monthly climatic trend in the Chame station during 1980 to 2009. The black  
 40 horizontal solid line indicates a significant correlation at the 95% confidence limit for a two-  
 41 tailed test and dashed horizontal line indicates a significant correlation at the 99% confidence  
 42 limit for a two-tailed test.

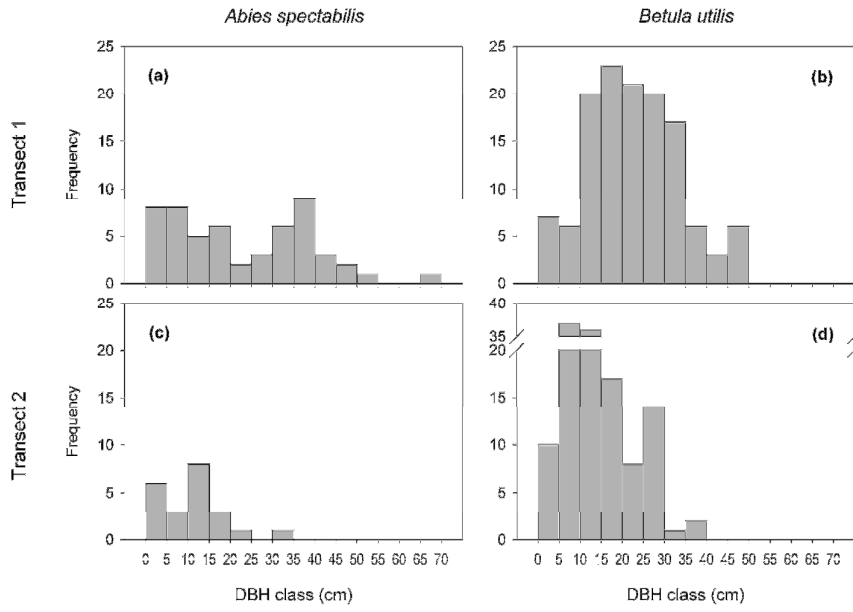

44

45 **Fig. S2 (a-d).** DBH class distributions of major tree species in T1 and T2.

46



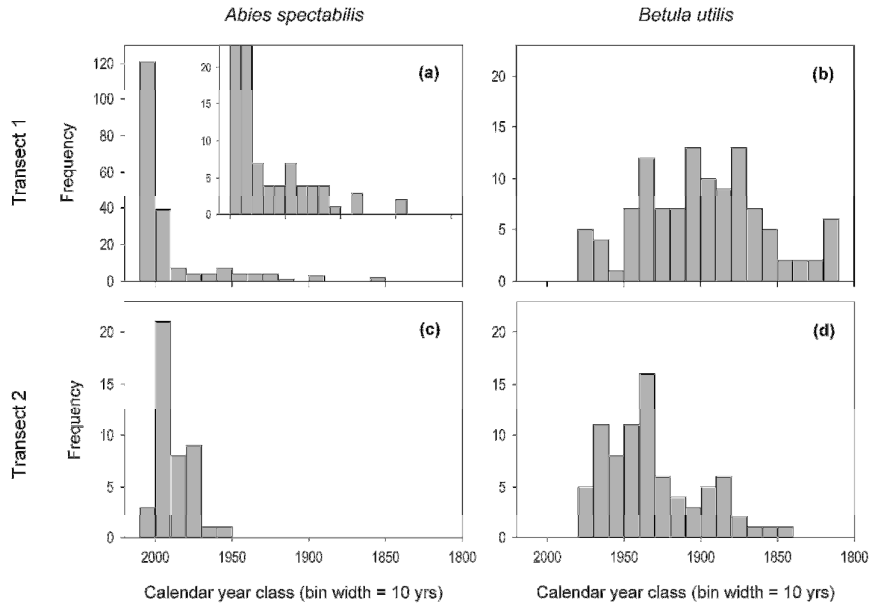

47

48 **Figs. S3 (a-d).** Age distribution (10yr class) of tree species with calendar year in T1 and T2.
